# Supplementary material
Source: PubMed Central journal article supplement (PMC3839080)
Supplement: NIHMS53848-supplement-01.pdf [file NIHMS53848-supplement-01.pdf]

DOI: 10.1038/ncb2092

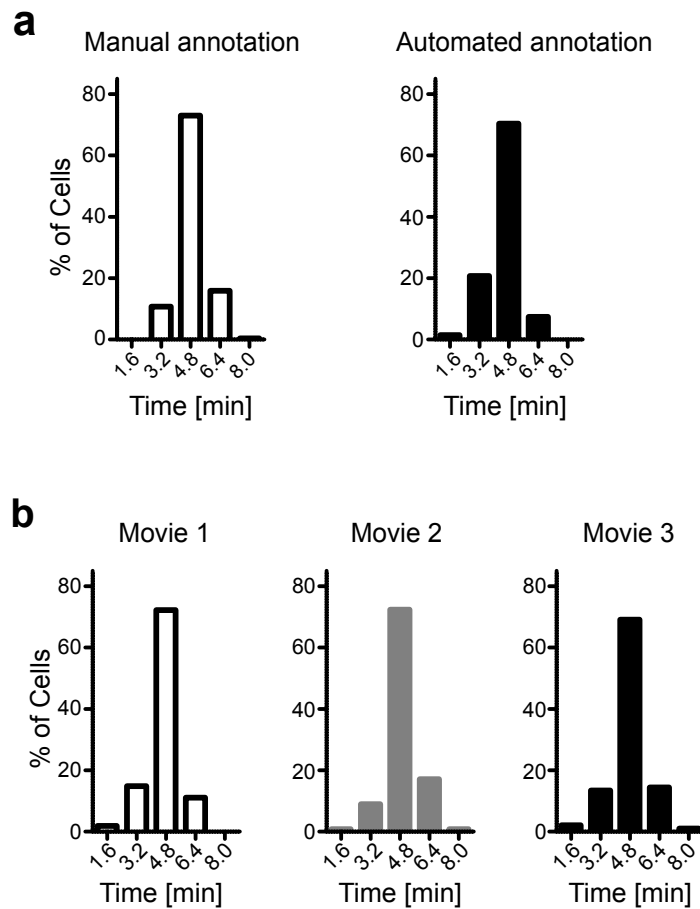

**Figure S1** Validation of automated image analysis. **(a)** Histograms of mitotic exit timing based on IBB-import after anaphase onset ( $t = 0$ ) of the same dataset analysed manually (left, white bars), or automatically (right, black bars). **(b)** Automated annotation is highly reproducibly between movies (three independent movies shown).

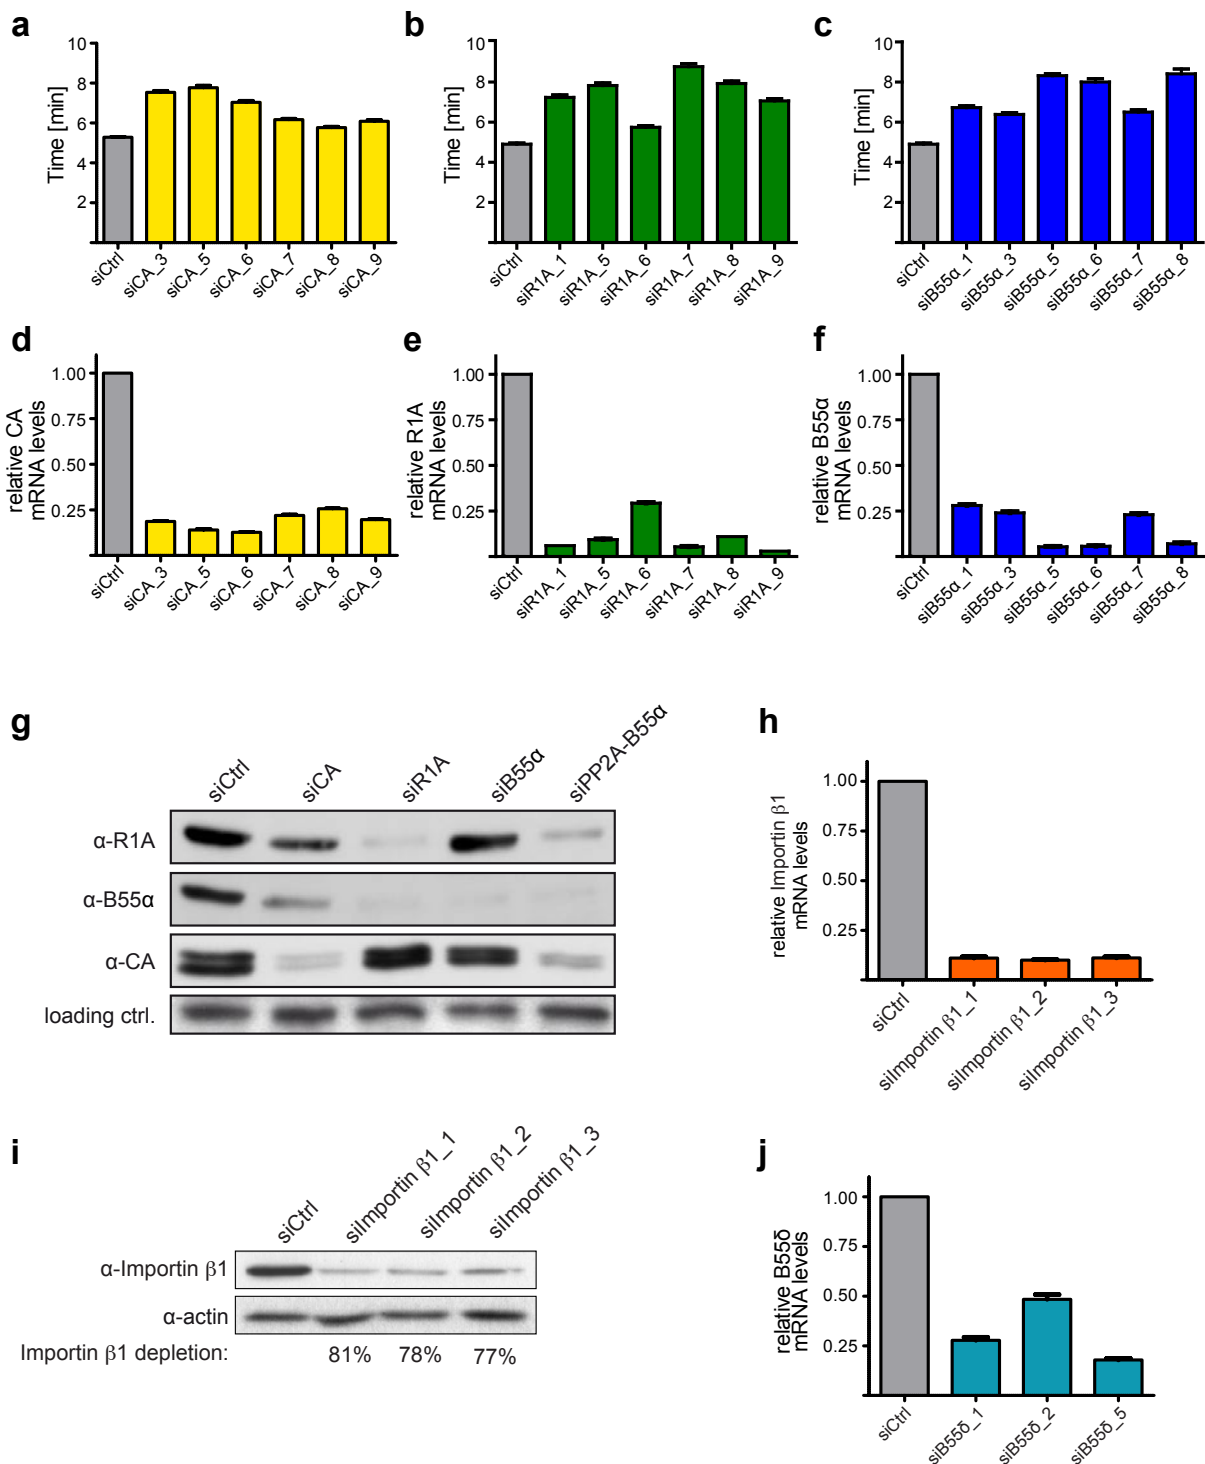

**Figure S2** Validation of RNAi efficiency. (a-c) Mitotic exit timing measured as in Figure 1, for six different siRNAs targeting CA ( $n \geq 382$  for each siRNA condition; mean $\pm$ s.d) (a), R1A ( $n \geq 175$  for each siRNA condition) (b), or B55 $\alpha$  ( $n \geq 108$  for each siRNA condition) (c). (d-f) Quantification of mRNA knockdown 40 h post transfection by real-time PCR for the same siRNAs as in (a-c), targeting CA (d), R1A (e), or B55 $\alpha$  (f), normalized against GAPDH ( $n = 3$  for each condition; mean $\pm$ s.d). See Supplementary Information, Table 2 for

siRNA sequences. (g) Protein depletion levels of CA, R1A, and B55 $\alpha$ , detected by Western blotting in cells depleted for the indicated siRNAs 60 h post-transfection. Note that depletion of CA or R1A co-depletes other subunits of the PP2A-B55 $\alpha$  complex, consistent with previous reports<sup>39,40</sup>. (h) Quantification of Importin  $\beta$ 1 mRNA knockdown 48 h post transfection. (i) Importin  $\beta$ 1 protein levels, detected by Western blotting 64 h after siRNA transfection. (j) Quantification of B55 $\delta$  mRNA knockdown 48 h post transfection.

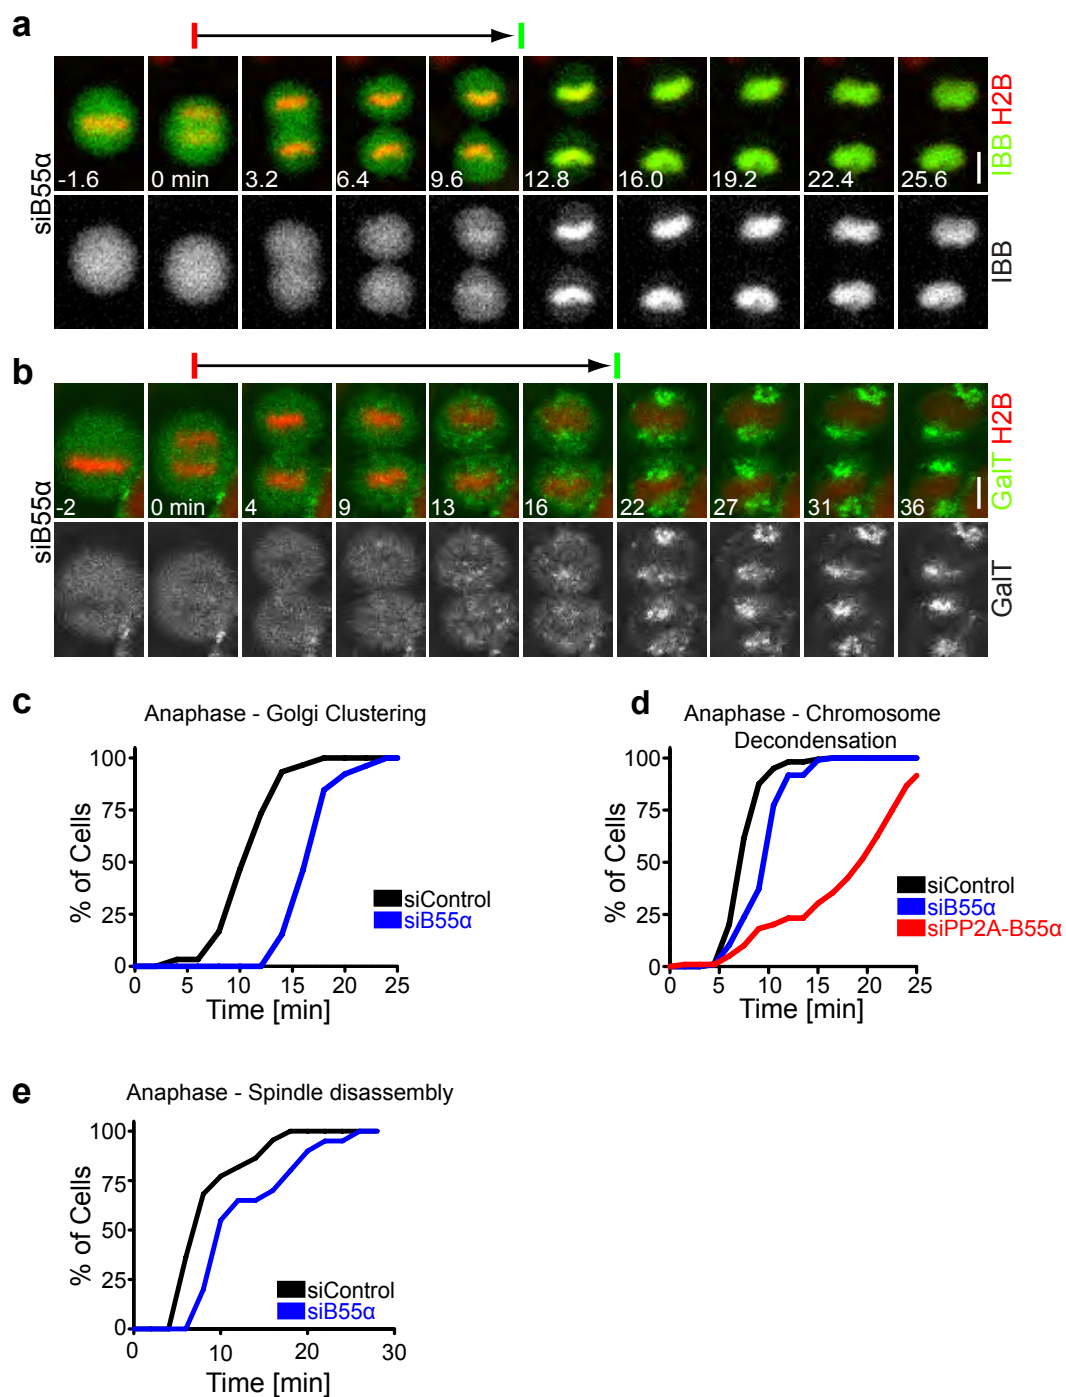

**Figure S3** Phenotypes of B55 $\alpha$  single depletions. **(a)** Nuclear reassembly timing in a B55 $\alpha$ -depleted cell, see also Supplementary Information, Movie S11. **(b)** Golgi reassembly timing in a B55 $\alpha$ -depleted cell, see also

Supplementary Information, Movie S12. **(c-e)** Cumulative histograms of postmitotic Golgi clustering **(c)**, chromosome decondensation **(d)**, and spindle disassembly **(e)** relative to anaphase onset (0 min). Scale bars: 10  $\mu$ m.

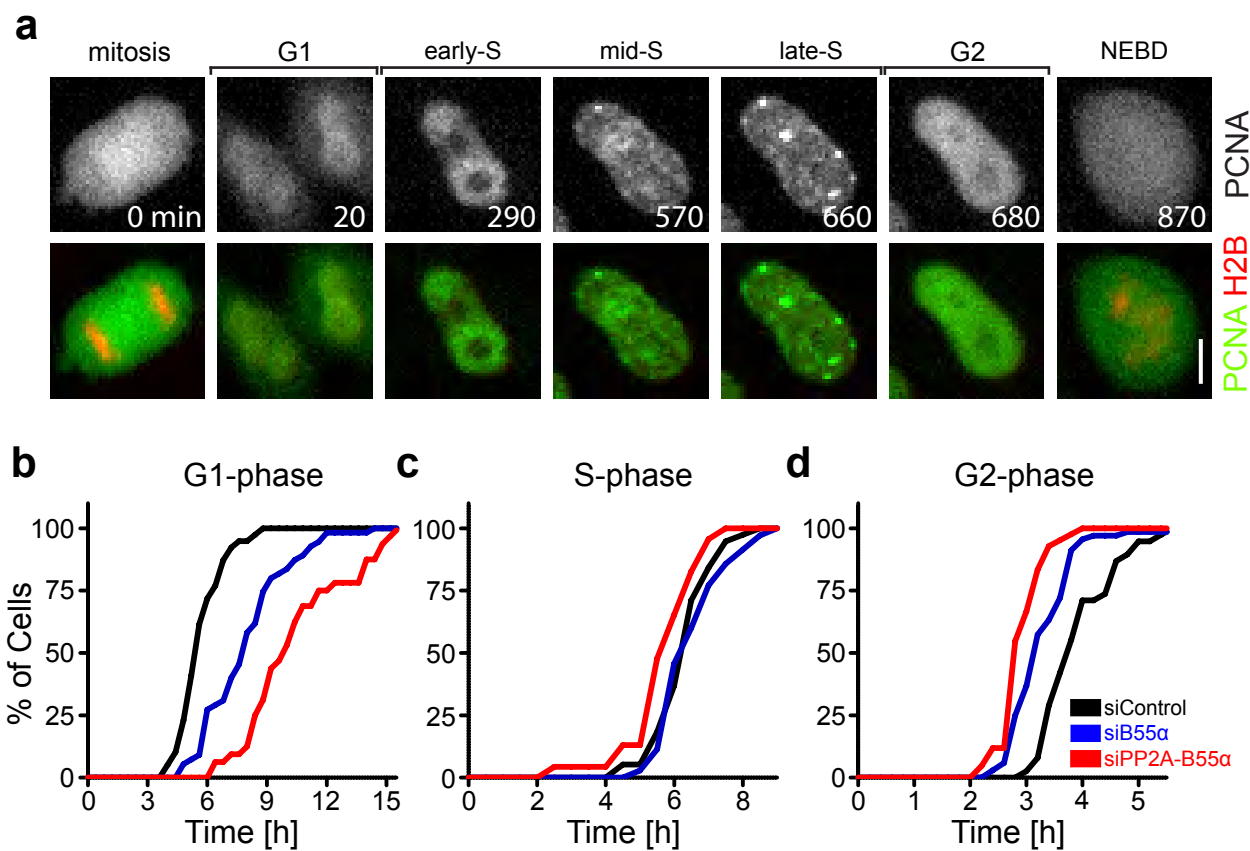

**Figure S4** Effect of PP2A-B55 $\alpha$ -depletion on cell cycle progression. **(a)** Cell cycle staging by DNA replication factor pattern of EGFP-PCNA. **(b, c,**

**d)** Cumulative histograms of G1-phase **(b)**, S-phase **(c)**, and G2-phase **(d)** duration. Scale bars: 10  $\mu$ m.

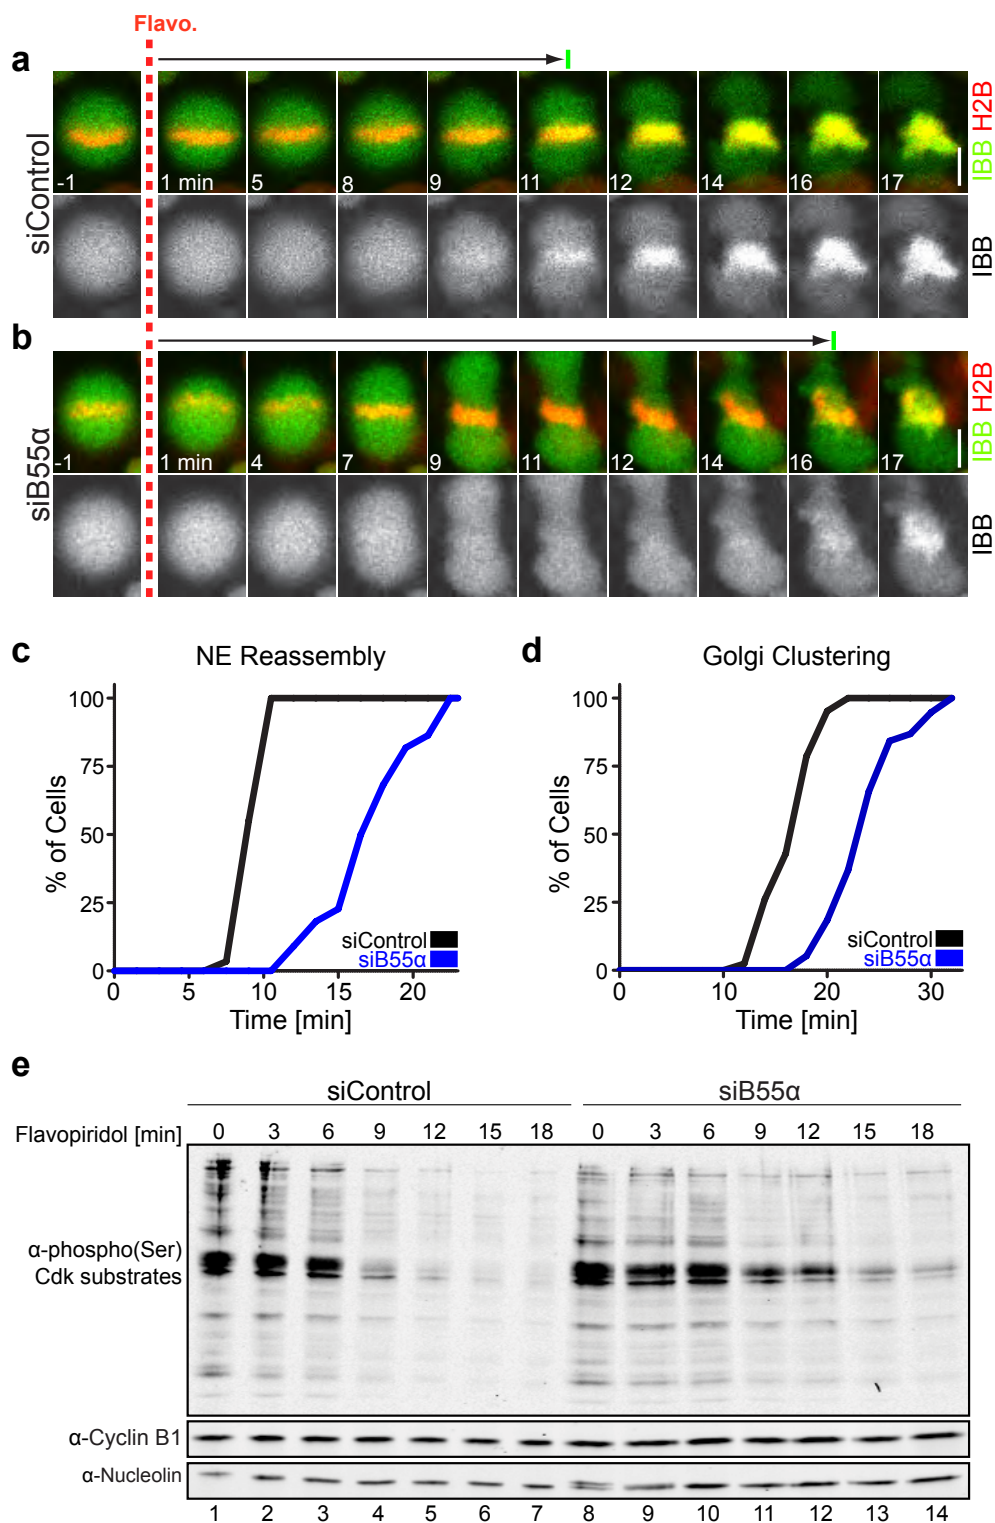

**Figure S5** B55 $\alpha$  functions downstream of Cdk1-cyclin B inactivation. **(a)** Movie of a cell transfected with non-silencing control siRNA, following the protocol indicated in Figure 4a. Arrowhead indicates onset of nuclear import of IBB-EGFP. **(b)** Time-lapse images of a cell transfected with siRNA targeting B55 $\alpha$ , see also Supplementary Information, Movie S13. **(c, d)** Cumulative histograms of nuclear envelope assembly

**(c)** and Golgi clustering **(d)** timing based on the data shown in (a-b, and data not shown). **(e)** Chemical induction of mitotic exit in presence of proteasome inhibitor in nocodazole arrested mitotic cells results in rapid dephosphorylation of Cdk substrates (siControl, lanes 1-7). Cells depleted for B55 $\alpha$  show delayed dephosphorylation (siB55 $\alpha$ , lanes 8-14). Scale bars: 10  $\mu$ m.

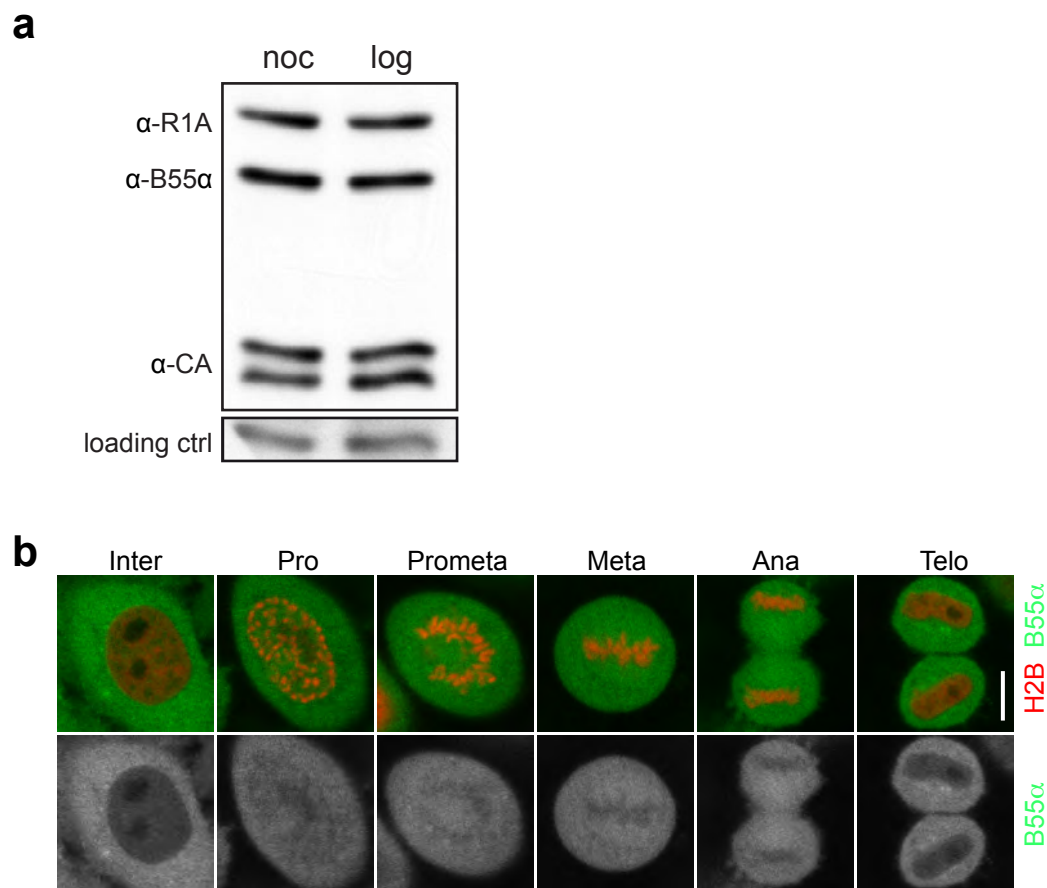

**Figure S6** Expression levels and localization of PP2A-B55 $\alpha$ . **(a)** PP2A-B55 $\alpha$  subunits are expressed at constant levels during the cell cycle. Whole cell lysates were probed by Western Blotting using the antibodies against CA, R1A, and B55 $\alpha$ . Left lane: 17 h nocodazole arrested cells (noc), right lane:

unsynchronized interphase cells (log). Note that CA migrates as a doublet band (see also Supplementary Information, Figure S2g). **(b)** Localization of B55 $\alpha$ . Confocal live images of cells expressing EGFP-mouse-B55 $\alpha$  from endogenous promoter (see Fig. 2b). Scale bar: 10  $\mu$ m.

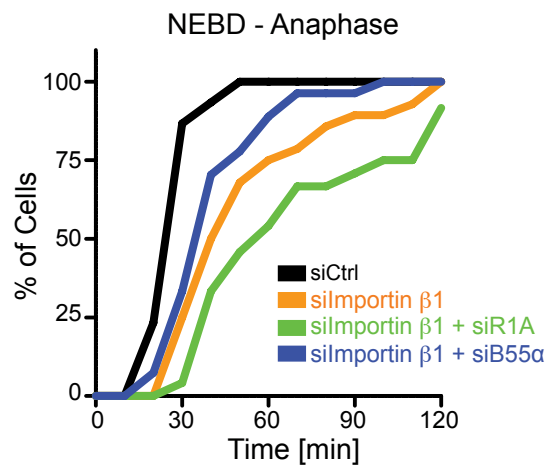

**Figure S7** Early mitotic progression in Importin  $\beta$ 1-depleted cells. Timing from prometaphase until anaphase was measured for the same cells shown in Fig. 5e.

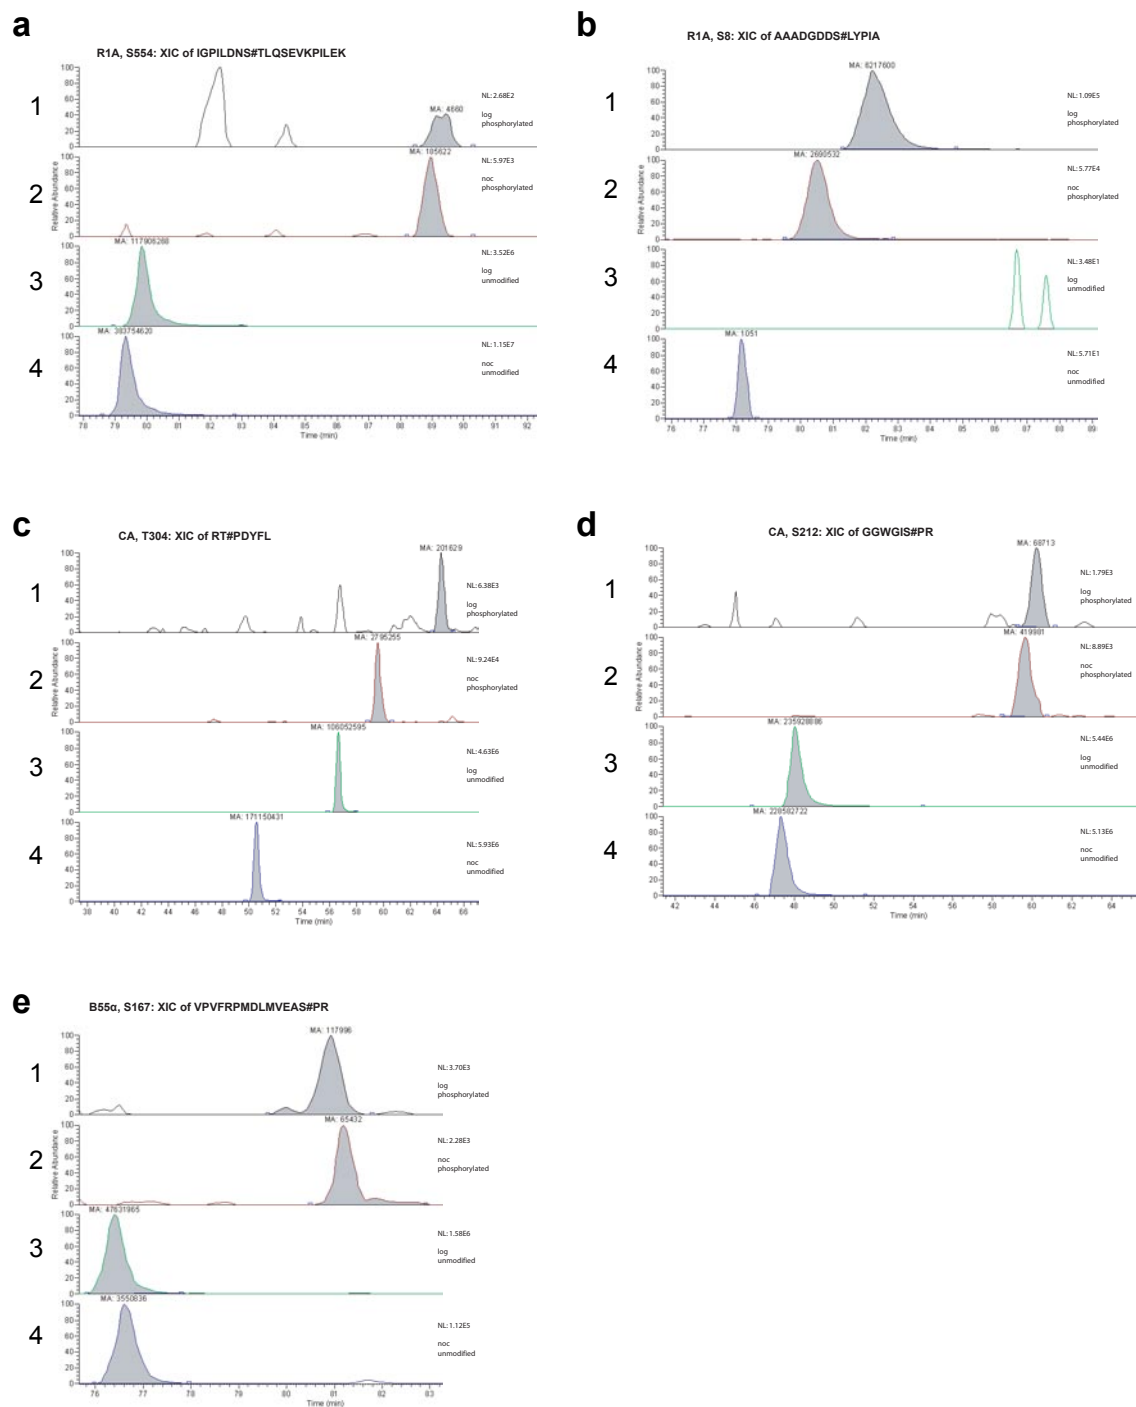

**Figure S8** Quantification of phosphorylation levels by extracted ion chromatograms. Extracted ion chromatograms (XICs) of phosphopeptides identified (hash indicates the phosphorylated amino acid), and their unmodified counterparts, from purified PP2A complexes. Peak-area values for the phosphopeptides were used for quantification of the mitotic increase in phosphorylation abundance, whereas those of the unmodified peptides were used for normalization, as described in the legend for Fig. 5f. The panels show: 1. XIC featuring the phosphorylated

peptide identified from the PP2A complex purified from interphase (log) cells. 2. XIC featuring the same phosphorylated peptide identified from the mitotic (noc) cell state. 3. XIC featuring the unmodified counterpart peptide from interphase. 4. XIC featuring the unmodified counterpart peptide from the mitotic (noc) cell state. **(a)** Quantitation of S554 phosphorylation on R1A. **(b)** S8 phosphorylation on R1A. **(c)** T304 phosphorylation on CA. **(d)** S212 phosphorylation on CA. **(e)** S167 phosphorylation on B55 $\alpha$ .



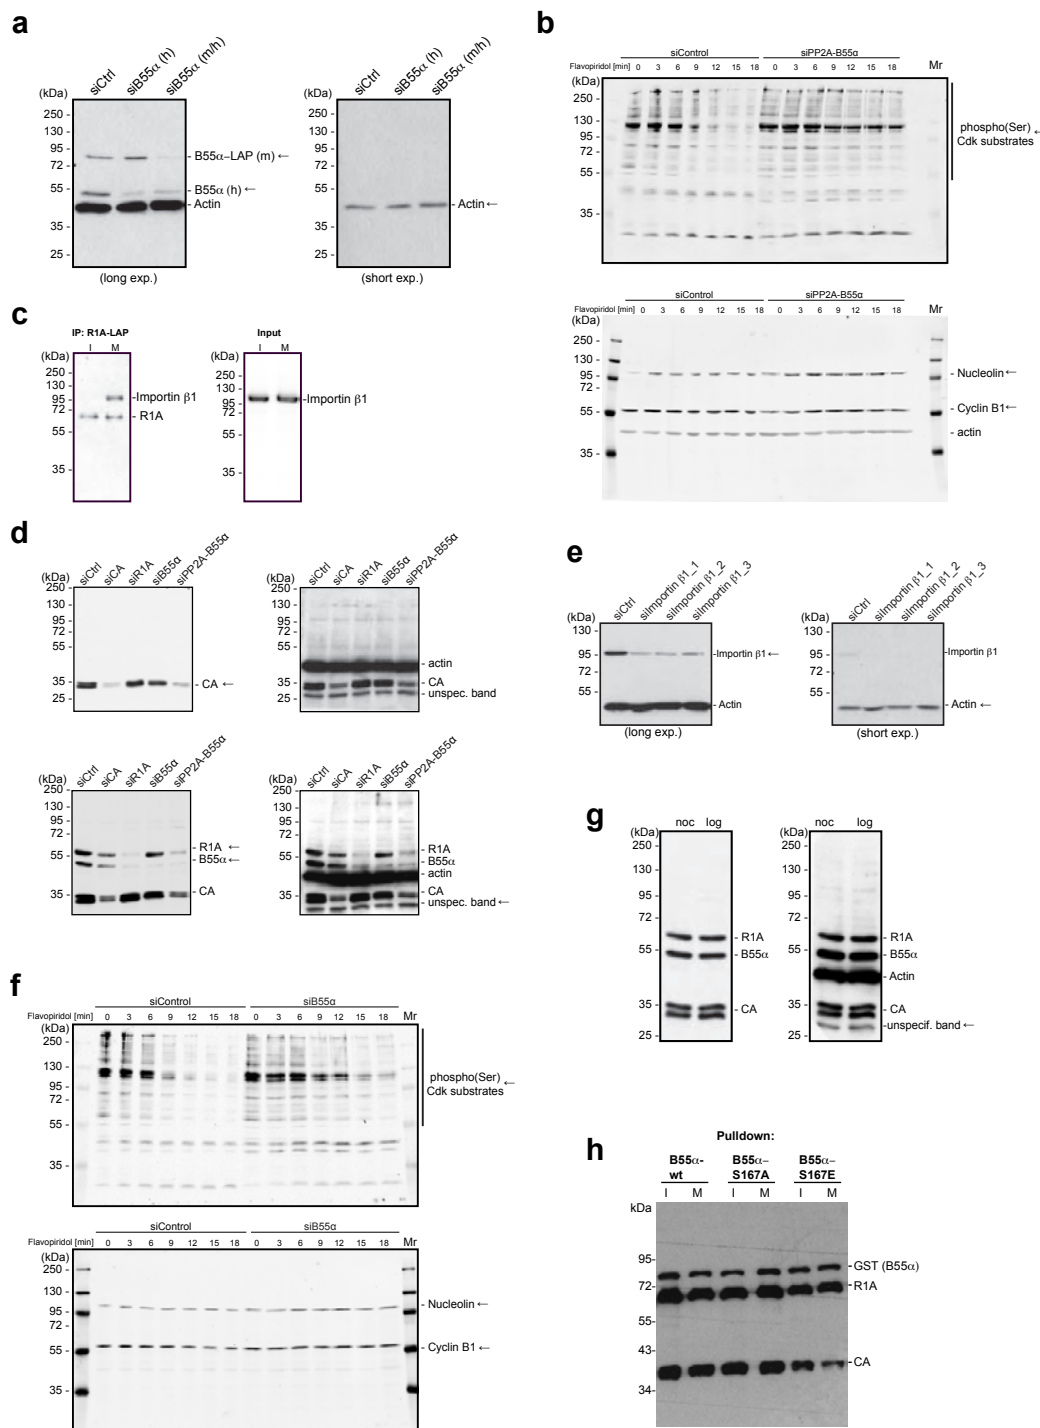

**Figure S9** Full scans of blots. **(a)** Full scan for B55α and Actin immunoblot of Figure 2b. **(b)** Full scan for phospho(Ser)Cdk substrates (upper) and Cyclin B1, Nucleolin, and Actin (lower) immunoblot of Figure 4f. **(c)** Full scan for Importin B1 and R1A IP-blot (left) and Importin B1 Input-blot (right) of Figure 5d. **(d)** Full scan for CA (upper left), R1A and B55α (lower left), and loading control blots (right panels) of Figure S2g. **(e)** Full scan

for Importin B1 and Actin immunoblot of Figure S2i. **(f)** Full scan for phospho(Ser)Cdk substrates (upper) and Cyclin B1, and Nucleolin (lower) immunoblot of Figure S5e. **(g)** Full scan for CA, R1A, and B55α (right) and Actin (left) immunoblot of Figure S6a. (Sliced bands are indicated with arrows). **(h)** Relevance of B55α-S167 phosphorylation for PP2A complex assembly. Independent replica of the experiment shown in Fig. 5g.

### Supplementary Movie Legends

**Movie S1** Monoclonal fluorescent HeLa cell line expressing chromatin marker H2B-mCherry and the nuclear import substrate IBB-EGFP. The movie shows 13% of the total image size and represent a typical overnight screening movie. Time-lapse covers a period of ~21 hours.

**Movie S2** H2B-mCherry / IBB-EGFP reporter cell that has been automatically detected, tracked, and segmented over time. Movie shows original images (left); mitotic stage classification with color label as in Fig. 1c (middle), and regions of IBB measurements (right). Time-lapse covers a period of 216 minutes.

**Movie S3** H2B-mCherry / IBB-EGFP cell treated with siControl. This movie shows mitotic progression and nuclear envelope reassembly in a control cell. Time-lapse covers a period of 192 minutes.

**Movie S4** H2B-mCherry / IBB-EGFP cell treated with siPP2A-B55 $\alpha$ . This movie shows mitotic progression and delayed nuclear envelope reassembly in a cell depleted for PP2A-B55 $\alpha$ . Time-lapse covers a period of 192 minutes.

**Movie S5** H2B-mCherry / GalT-EGFP cell treated with siControl. This movie shows mitotic progression and Golgi reassembly in a control cell. Time-lapse covers a period of 132 minutes.

**Movie S6** H2B-mCherry / GalT-EGFP cell treated with siPP2A-B55 $\alpha$ . This movie shows mitotic progression and delayed Golgi reassembly in a cell depleted for PP2A-B55 $\alpha$ . Time-lapse covers a period of 161 minutes.

**Movie S7** H2B-mCherry / mEGFP- $\alpha$ -tubulin cell treated with siControl. This movie shows mitotic progression and mitotic spindle dynamics in a control cell. Time-lapse covers a period of 108 minutes.

**Movie S8** H2B-mCherry / mEGFP- $\alpha$ -tubulin cell treated with siPP2A-B55 $\alpha$ . This movie shows mitotic progression and delayed mitotic spindle disassembly in a cell depleted for PP2A-B55 $\alpha$ . Time-lapse covers a period of 108 minutes.

**Movie S9** H2B-mCherry / IBB-EGFP cell treated with siControl. This movie shows forced mitotic exit in presence of MG132 by addition of the Cdk inhibitor flavopiridol in a control cell. Time-lapse covers a period of 47 minutes.

**Movie S10** H2B-mCherry / IBB-EGFP cell treated with siPP2A-B55 $\alpha$ . This movie shows delayed mitotic exit in presence of MG132 by addition of the Cdk inhibitor flavopiridol in a cell depleted for PP2A-B55 $\alpha$ . Time-lapse covers a period of 47 minutes.









|        |           |                |                                  |           |                                                                                     |                       |                        |                      |
|--------|-----------|----------------|----------------------------------|-----------|-------------------------------------------------------------------------------------|-----------------------|------------------------|----------------------|
| 179954 | KIAA1949  | Hs KIAA1949_4  | NM_133474 XM_928867 XM_934935 XM | S02824423 | KIAA1949                                                                            | TCGGTTGGAGGCGGAGAGAAA | UUUUCUUCGCGGCGGACGCGg  | CGUUCGAGGCGGAGAGAAA# |
| 201562 | PTPLB     | Hs PTPLB_5     | NM_198402                        | S02659454 | protein tyrosine phosphatase-like (proline instead of catalytic arginine), member b | CACGGCGTACTGGTCATCTA  | UAGAUAACACGAGUAGCGCCGg | CGCGUACUUGGUCACUCU#  |
| 201562 | PTPLB     | Hs PTPLB_6     | NM_198402                        | S02659461 | protein tyrosine phosphatase-like (proline instead of catalytic arginine), member b | CACCGAGAAATAGTTGCTA   | UACCAACUUAUUCUUCGCGg   | CGCAAGAAUAGUUCGUA#   |
| 201562 | PTPLB     | Hs PTPLB_3     | NM_198402                        | S00164171 | protein tyrosine phosphatase-like (proline instead of catalytic arginine), member b | TACGCTTAAC1TCTATGAT   | AUGCAUAGAAAGUUAAGCG#   | CGCUUAACUUCUUAUGAU#  |
| 286262 | C8orf75   | Hs C8orf75_1   | NM_173891                        | S00335965 | chromosome 9 open reading frame 75                                                  | CTCCTCAAGAAAGAAGATGA  | UUCAUCUUCUUCUUGAGGg    | CCUCAAGAAAGAAGUAGA#  |
| 286262 | C8orf75   | Hs C8orf75_2   | NM_173891                        | S00335972 | chromosome 9 open reading frame 75                                                  | CACAGTGGTGCCCAAGAGAA  | UUUCUUCUUGGCACCAUUGg   | CAGUUGUCCCAAGAGAA#   |
| 286262 | C8orf75   | Hs C8orf75_3   | NM_173891                        | S00335976 | chromosome 9 open reading frame 75                                                  | TCGAAATCTTTCACTGAT    | AUAGCCAUAAAGAAUUCg     | GAUAUUCUUCUUCALGCA#  |
| 391025 | LOC391025 | Hs LOC391025_5 | KM_001131228 XM_372775           | S04380859 | similar to protein tyrosine phosphatase, receptor type, U isoform 2 precursor       | CCGCGAGAGCCGATGACGA   | UCCGUUCALUGCCUCCUGGg   | GCAGAAAGCCGAGUAGCA#  |
| 391025 | LOC391025 | Hs LOC391025_6 | KM_001131228 XM_372775           | S04380866 | similar to protein tyrosine phosphatase, receptor type, U isoform 2 precursor       | CCACATGATGAGCCACATGGA | UCCAUUGUUCUUCALUGGg    | ACAUGAUGAGCCACUAGG#  |
| 391025 | LOC391025 | Hs LOC391025_7 | KM_001131228 XM_372775           | S04380873 | similar to protein tyrosine phosphatase, receptor type, U isoform 2 precursor       | CCTGTGCTTATAGACACTCA  | UGAGUUGUUAUAGAGACAGg   | UGUUCUUCALUAGACUCU#  |
| 40927  | LOC40927  | Hs LOC40927_1  | KM_376010                        | S00548660 | TPTE and PTEN homologous inositol lipid phosphatase pseudogene                      | TCGAGTGTCTGAACTGGA    | UUUAGUUCAGAAUACGUGg    | CAGUGUUCUUGAGCGG#    |
| 40927  | LOC40927  | Hs LOC40927_2  | NM_001034843 NR_002821 XM_376010 | S00548667 | TPTE and PTEN homologous inositol lipid phosphatase pseudogene                      | ATGGATGT1TCTCTGASTA   | UACUCGAAAGAAACALCC#    | GGAUUCUUCUUCUGAGUA#  |
| 40927  | LOC40927  | Hs LOC40927_3  | NM_001034843 NR_002821 XM_376010 | S00548674 | TPTE and PTEN homologous inositol lipid phosphatase pseudogene                      | TCCACAGCAAAACGATTTAA  | UUAAAUCUUCUUCUGUGg     | CACAGCAAAAGAAUUA#    |

Supplementary Information Table 2. siRNA oligos targeting PP2A-B55 $\alpha$ , B55 $\delta$ , and Importin  $\beta$ 1.

| Entrez Gene ID | NCBI gene symbol | Symbol used this study | Gene Description                                                         | mRNA Accessions        | siRNA Target Sequence  | Qiagen Product ID | Product Name | mRNA knockdown this study |
|----------------|------------------|------------------------|--------------------------------------------------------------------------|------------------------|------------------------|-------------------|--------------|---------------------------|
| 5515           | PPP2CA           | CA_3                   | protein phosphatase 2 (formerly 2A), catalytic subunit, alpha isoform    | NM_002715              | ACACCTCGTGAATACAATTTA  | SI00041853        | Hs_PPP2CA_3  | 81%                       |
| 5515           | PPP2CA           | CA_5                   | protein phosphatase 2 (formerly 2A), catalytic subunit, alpha isoform    | NM_002715              | ATGGAACTTGACGATACTCTA  | SI02225763        | Hs_PPP2CA_5  | 86%                       |
| 5515           | PPP2CA           | CA_6                   | protein phosphatase 2 (formerly 2A), catalytic subunit, alpha isoform    | NM_002715              | CAAACAATCATTGGAGCTTAA  | SI02225790        | Hs_PPP2CA_6  | 87%                       |
| 5515           | PPP2CA           | CA_7                   | protein phosphatase 2 (formerly 2A), catalytic subunit, alpha isoform    | NM_002715              | TAAGACGATGTGACTGCACAA  | SI04436453        | Hs_PPP2CA_7  | 78%                       |
| 5515           | PPP2CA           | CA_8                   | protein phosphatase 2 (formerly 2A), catalytic subunit, alpha isoform    | NM_002715              | ATGGTGGTCTCTCGCCATCTA  | SI04436460        | Hs_PPP2CA_8  | 74%                       |
| 5515           | PPP2CA           | CA_9                   | protein phosphatase 2 (formerly 2A), catalytic subunit, alpha isoform    | NM_002715              | TACAAAGCCTCTTGTATCAA   | SI04436467        | Hs_PPP2CA_9  | 80%                       |
| 5518           | PPP2R1A          | R1A_1                  | protein phosphatase 2 (formerly 2A), regulatory subunit A, alpha isoform | NM_014225              | TCCCATCTTGGCAAAGACAA   | SI00103733        | Hs_PPP2R1A_1 | 94%                       |
| 5518           | PPP2R1A          | R1A_5                  | protein phosphatase 2 (formerly 2A), regulatory subunit A, alpha isoform | NM_014225              | CTGGTGTCCGATGCCAACCAA  | SI02225811        | Hs_PPP2R1A_5 | 91%                       |
| 5518           | PPP2R1A          | R1A_6                  | protein phosphatase 2 (formerly 2A), regulatory subunit A, alpha isoform | NM_014225              | ACGGCTGAACATCATCTCTAA  | SI02225818        | Hs_PPP2R1A_6 | 71%                       |
| 5518           | PPP2R1A          | R1A_7                  | protein phosphatase 2 (formerly 2A), regulatory subunit A, alpha isoform | NM_014225              | GACCAGGATGTGGAGGTGAAA  | SI04436495        | Hs_PPP2R1A_7 | 95%                       |
| 5518           | PPP2R1A          | R1A_8                  | protein phosphatase 2 (formerly 2A), regulatory subunit A, alpha isoform | NM_014225              | ATCGGGTGTCTATAGACGAA   | SI04436502        | Hs_PPP2R1A_8 | 89%                       |
| 5518           | PPP2R1A          | R1A_9                  | protein phosphatase 2 (formerly 2A), regulatory subunit A, alpha isoform | NM_014225              | CACCTTGCAGAGTGGAAGTCAA | SI04436509        | Hs_PPP2R1A_9 | 97%                       |
| 5520           | PPP2R2A          | R2A_1                  | protein phosphatase 2 (formerly 2A), regulatory subunit B, alpha isoform | NM_002717              | CTCGCCGTGTGGCACTGAA    | SI00041895        | Hs_PPP2R2A_1 | 72%                       |
| 5520           | PPP2R2A          | R2A_3                  | protein phosphatase 2 (formerly 2A), regulatory subunit B, alpha isoform | NM_002717              | AAGCGAGACATAACCCCTAGAA | SI00041909        | Hs_PPP2R2A_3 | 76%                       |
| 5520           | PPP2R2A          | R2A_5                  | protein phosphatase 2 (formerly 2A), regulatory subunit B, alpha isoform | NM_002717              | CTGCAGATGATTTGCCGGATA  | SI02225825        | Hs_PPP2R2A_5 | 95%                       |
| 5520           | PPP2R2A          | R2A_6                  | protein phosphatase 2 (formerly 2A), regulatory subunit B, alpha isoform | NM_002717              | ATGGAAGGTATAGAGATCCTA  | SI02225832        | Hs_PPP2R2A_6 | 94%                       |
| 5520           | PPP2R2A          | R2A_7                  | protein phosphatase 2 (formerly 2A), regulatory subunit B, alpha isoform | NM_002717              | CCCGTCTTGGTGGTGGTATA   | SI04436516        | Hs_PPP2R2A_7 | 77%                       |
| 5520           | PPP2R2A          | R2A_8                  | protein phosphatase 2 (formerly 2A), regulatory subunit B, alpha isoform | NM_002717              | CAGTCTCATAGCAGAGGAGAA  | SI04436523        | Hs_PPP2R2A_8 | 93%                       |
| 55844          | PPP2R2D          | B55 $\delta$           | protein phosphatase 2, regulatory subunit B, delta isoform               | NM_001003656 NM_018461 | CAGAGACTACCTGTCCGTGAA  | SI00691523        | Hs_PPP2R2D_1 | 72%                       |
| 55844          | PPP2R2D          | B55 $\delta$           | protein phosphatase 2, regulatory subunit B, delta isoform               | NM_001003656 NM_018461 | CCGCTCCATTAAAGAACAGTGA | SI00691530        | Hs_PPP2R2D_2 | 52%                       |
| 55844          | PPP2R2D          | B55 $\delta$           | protein phosphatase 2, regulatory subunit B, delta isoform               | NM_001003656 NM_018461 | TTCATCCATATCCGATGTAAA  | SI02759148        | Hs_PPP2R2D_5 | 82%                       |
| 3837           | KPNB1            | Importin $\beta$ 1     | karyopherin (importin) beta 1                                            | NM_002265              | TCGGTTATATTTGCCAAGATA  | SI00035490        | Hs_KPNB1_1   | 89%                       |
| 3837           | KPNB1            | Importin $\beta$ 1     | karyopherin (importin) beta 1                                            | NM_002265              | CAAGAACTCTTTGACATCTAA  | SI00035497        | Hs_KPNB1_2   | 90%                       |
| 3837           | KPNB1            | Importin $\beta$ 1     | karyopherin (importin) beta 1                                            | NM_002265              | AAGGGCGGAGATCGAAGACTA  | SI00035504        | Hs_KPNB1_3   | 89%                       |

red = used for single or triple knockdown, this study.



### Supplementary Information Table 3. Plasmids generated for this study

For efficient generation of cell lines stably expressing fluorescently tagged marker proteins, the genes were subcloned into pIRES-puro2 and pIRES-neo3 vectors (Clontech) that allow expression of resistance genes and tagged proteins from a single transcript.

**Table 3. Generated plasmids**

| Plasmid name           | Tag                | Source plasmids                             | Vector backbone | Backbone cloning sites |
|------------------------|--------------------|---------------------------------------------|-----------------|------------------------|
| pIBB-mEGFP-IRES-puro2b | mEGFP <sup>1</sup> | pIBB-mEGFP <sup>2</sup>                     | pIRES-puro2b    | EcoRI/NotI             |
| pGalT-GFP-IRES-puro2b  | GFP                | pGalT-GFP (MluI blunted/EcoRI) <sup>3</sup> | pIRES-puro2b    | (NotI blunted/EcoRI)   |
| pEGFP-PCNA-IRES-puro2b | mEGFP <sup>1</sup> | pNLS-EGFP-PCNA <sup>4</sup>                 | pIRES-puro2b    | (NdeI, XbaI)           |

mEGFP indicates monomeric EGFP.

### Supplementary Information Table 4. Monoclonal fluorescent reporter cell lines

Stable cell lines were generated as described in <sup>5</sup>.

**Table 4. HeLa Kyoto monoclonal cell lines**

| Background   | Cell line name                                        | Plasmid 1              | Plasmid 2                             |
|--------------|-------------------------------------------------------|------------------------|---------------------------------------|
| HeLa 'Kyoto' | H2B-mCherry                                           | pH2B-mCherry-IRES-neo3 | -                                     |
| HeLa 'Kyoto' | H2B-mCherry and IBB-mEGFP                             | pH2B-mCherry-IRES-neo3 | pIBB-mEGFP-IRES-puro2b                |
| HeLa 'Kyoto' | H2B-mCherry and GalT-GFP                              | pH2B-mCherry-IRES-neo3 | pGalT-GFP-IRES-puro2b                 |
| HeLa 'Kyoto' | H2B-mCherry and PCNA-mEGFP                            | pH2B-mCherry-IRES-neo3 | pPCNA-mEGFP-IRES-puro2b               |
| HeLa 'Kyoto' | H2B-mCherry and mEGFP- $\alpha$ -tubulin <sup>6</sup> | pH2B-mCherry-IRES-neo3 | pmEGFP- $\alpha$ -tubulin-IRES-puro2b |

### Supplementary references

1. Snapp, E.L. *et al.* Formation of stacked ER cisternae by low affinity protein interactions. *J Cell Biol* **163**, 257-269 (2003).
2. Dultz, E. *et al.* Systematic kinetic analysis of mitotic dis- and reassembly of the nuclear pore in living cells. *J Cell Biol* **180**, 857-865 (2008).
3. Schaub, B.E., Berger, B., Berger, E.G. & Rohrer, J. Transition of galactosyltransferase 1 from trans-Golgi cisterna to the trans-Golgi network is signal mediated. *Mol Biol Cell* **17**, 5153-5162 (2006).
4. Leonhardt, H. *et al.* Dynamics of DNA replication factories in living cells. *J Cell Biol* **149**, 271-280. (2000).
5. Schmitz, M. & Gerlich, D. Automated live microscopy to study mitotic gene function. *Methods in Molecular Biology*, In press (2007).
6. Steigemann, P. *et al.* Aurora B-mediated abscission checkpoint protects against tetraploidization. *Cell* **136**, 473-484 (2009).
